# Supplementary material
Source: Springer Nature journal article supplement (https://www.springermedizin.de/resource/supplementary/12936_2009_1243_MOESM3_ESM.pdf/9549312)

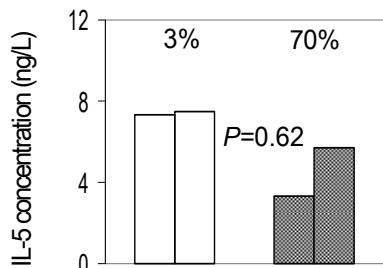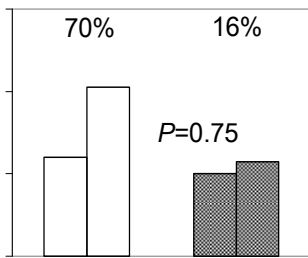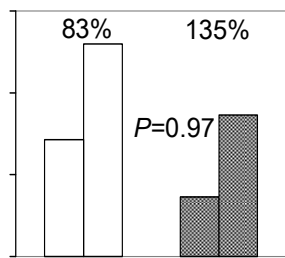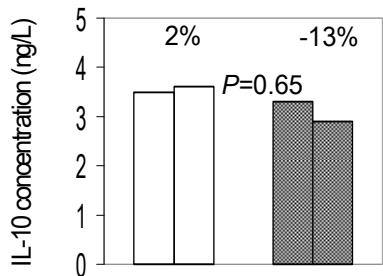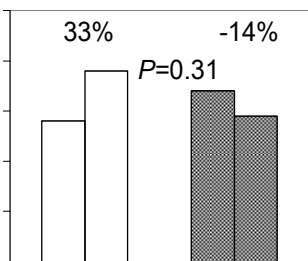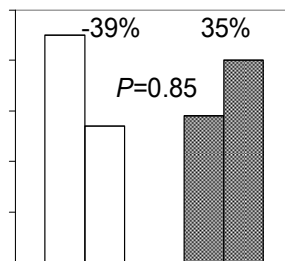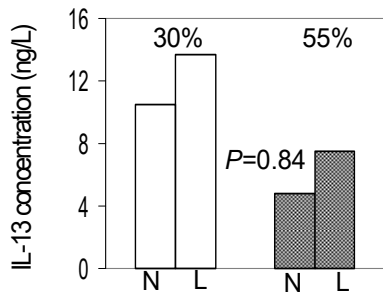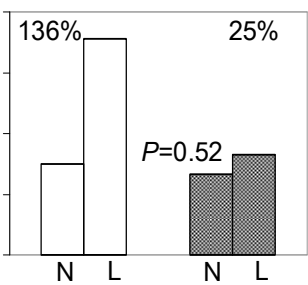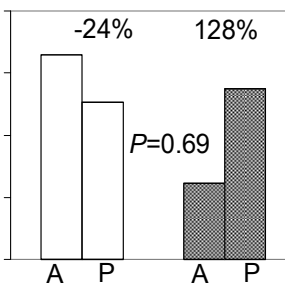

Zinc concentration

Magnesium concentration

Iron deficiency anaemia

Supplement: MOESM3 [file 9549312]
